1 **A healthy childhood environment helps to combat inherited susceptibility to obesity**

2

3 Anke Hüls\*<sup>1</sup>, Marvin N Wright\*<sup>2</sup>, Leonie H Bogl<sup>3,4</sup>, Jaakko Kaprio<sup>4,5</sup>, Lauren Lissner<sup>6</sup>, Denes  
4 Molnár<sup>7</sup>, Luis Moreno<sup>8,9</sup>, Stefaan De Henauw<sup>10</sup>, Alfonso Siani<sup>11</sup>, Toomas Veidebaum<sup>12</sup>,  
5 Wolfgang Ahrens<sup>2,13</sup>, Iris Pigeot<sup>#2,13</sup>, Ronja Foraita<sup>#2</sup> on behalf of the IDEFICS/I.Family  
6 consortia

7

8 <sup>1</sup> Departments of Epidemiology and Environmental Health, Rollins School of Public Health,  
9 Emory University, Atlanta, Georgia, USA

10 <sup>2</sup> Leibniz Institute for Prevention Research and Epidemiology – BIPS, Bremen, Germany

11 <sup>3</sup> Department of Epidemiology, Center for Public Health, Medical University of Vienna, Austria

12 <sup>4</sup> Institute of Molecular Medicine FIMM, University of Helsinki, Helsinki, Finland

13 <sup>5</sup> Department of Public Health, University of Helsinki, Helsinki, Finland

14 <sup>6</sup> Department of Public Health and Community Medicine, Institute of Medicine, Sahlgrenska  
15 Academy, University of Gothenburg, Gothenburg, Sweden

16 <sup>7</sup> Department of Paediatrics, Medical School, University of Pécs, Pécs, Hungary

17 <sup>8</sup> GENU (Growth, Exercise, Nutrition and Development) Research Group, University of  
18 Zaragoza, Instituto Agroalimentario de Aragón (IA2), Instituto de Investigación Sanitaria de  
19 Aragón (IIS Aragón), Zaragoza, Spain

20 <sup>9</sup> Centro de Investigación Biomédica en Red de Fisiopatología de la Obesidad y Nutrición  
21 (CIBEROBN), Instituto de Salud Carlos III, Madrid, Spain

22 <sup>10</sup> Department of Public Health and Primary Care, Faculty of Medicine and Health Sciences,  
23 Ghent University, Ghent, Belgium

24 <sup>11</sup> Institute of Food Sciences, CNR, Avellino, Italy

25 <sup>12</sup> Department of Chronic Diseases, National Institute for Health Development, Tallinn, Estonia

26 <sup>13</sup> University of Bremen, Faculty of Mathematics and Computer Science, Bremen, Germany

27

28 \*,# equal contribution

29

30 **Corresponding author:**

31 Ronja Foraita, PhD

32 Leibniz Institute for Prevention Research and Epidemiology – BIPS

33 Achterstr. 30

34 28359 Bremen, Germany

35 Email: [foraita@leibniz-bips.de](mailto:foraita@leibniz-bips.de)

36 Phone: +49 (0)421 218-56-954

37

38 **Funding:** The IDEFICS study was financially supported by the European Commission within  
39 the Sixth RTD Framework Programme Contract No. 016181 (FOOD); the I.Family study was  
40 funded by the European Commission within the Seventh RTD Framework Programme  
41 Contract No. 266044 (KBBE 2010-14). Participating partners have contributed their own  
42 resources to the genotyping of children. AH was supported by a research fellowship from the  
43 Deutsche Forschungsgemeinschaft (DFG; HU 2731/1-1) and by the HERCULES Center  
44 (NIEHS P30ES019776).

45

46 **Abstract**

47 Objectives: To investigate the degree by which the inherited susceptibility to obesity is modified  
48 by environmental factors during childhood and adolescence.

49 Design: Cohort study with repeated measurements of diet, lifestyle factors and anthropometry.

50 Setting: The pan-European IDEFICS/I.Family cohort

51 Participants: 8,609 repeated observations from 3,098 children aged 2 to 16 years, examined  
52 between 2007 and 2014.

53 Main outcome measures: Body mass index (BMI) and waist circumference. Genome-wide  
54 polygenic risk scores (PRS) to capture the inherited susceptibility of obesity were calculated  
55 using summary statistics from independent genome-wide association studies of BMI. Gene-  
56 environment interactions of the PRS with sociodemographic (European region, socioeconomic  
57 status) and lifestyle factors (diet, screen time, physical activity) were estimated.

58 Results: The PRS was strongly associated with BMI ( $r^2 = 0.11$ ,  $p\text{-value} = 7.9 \times 10^{-81}$ ) and waist  
59 circumference ( $r^2 = 0.09$ ,  $p\text{-value} = 1.8 \times 10^{-71}$ ) in our cohort. The associations with BMI  
60 increased from  $r^2=0.03$  in 3-year olds to  $r^2=0.18$  in 14-year olds and associations with waist  
61 circumference from  $r^2=0.03$  to  $r^2=0.14$ . Being in the top decile of the PRS distribution was  
62 associated with 3.63 times higher odds for obesity (95% confidence interval (CI): [2.57, 5.14]).  
63 We observed significant interactions with demographic and lifestyle factors for BMI as well as  
64 waist circumference. The risk of becoming obese among those with higher genetic  
65 susceptibility was ~38% higher in children from Southern Europe (BMI:  $p\text{-interaction} = 0.0066$ ,  
66 Central vs. Southern Europe) and ~61% higher in children with a low parental education (BMI:  
67  $p\text{-interaction} = 0.0012$ , low vs. high). Furthermore, the risk was attenuated by a higher intake  
68 of dietary fiber (BMI:  $p\text{-interaction}=0.0082$ ) and shorter screen times (BMI:  $p\text{-}$   
69  $\text{interaction}=0.018$ ).

70 Conclusions: Our results highlight that a healthy childhood environment might partly offset a  
71 genetic predisposition to obesity during childhood and adolescence.

72

73

74 **Key words:** Adolescents, BMI, children, gene-environment interaction, nutrition, physical  
75 activity, screen time, socio-demographic factors, polygenic risk score, waist circumference

## 76 **Introduction**

77 Obesity is a complex multifaceted condition and its prevalence has been increasing  
78 continuously over previous decades and has reached a high plateau in Western countries [1].  
79 In 2015, a total of 107.7 million children and 603.7 million adults were obese. Although the  
80 prevalence of obesity among children has been lower than that among adults, the rate of  
81 increase in childhood obesity has been greater than the rate of increase in adult obesity, which  
82 is most likely due to adverse changes of environmental and demographic factors with a direct  
83 impact on children's health [2].

84 With the advent of genome-wide association studies (GWAS), it was shown that multiple  
85 genetic loci increase the susceptibility to obesity [3,4]. However, genome-wide significant  
86 variants identified in the first large-scale GWAS on body mass index (BMI) only account for a  
87 small portion of BMI variation (~2.7%) [3]. A more recent genome-wide meta-analysis extended  
88 the number of individuals from ~300,000 [3] to ~700,000 [4], which consequently increased  
89 the number of genome-wide significant SNPs from 97 to 751. Even these 751 genome-wide  
90 significant SNPs account for only ~6.0% of the variance of BMI [4]. However, genome-wide  
91 estimates suggest that common variation accounts for >20% of BMI variation [3], which  
92 highlights the polygenic architecture of BMI. More recently, whole genome data even increased  
93 the fraction of variance of BMI accounted for by genetic variants, both common and rare, to  
94 40% [5]. From twin studies we know that the heritability of BMI also depends on socioeconomic  
95 status [6] and physical activity [7], suggesting that when socioeconomic status or physical  
96 activity is high, genetic factors become less influential. Using candidate SNPs - either single  
97 genotypes or <100 SNPs combined in a polygenic risk score (PRS), which is defined as a  
98 weighted sum of BMI-related risk alleles - it was further shown that the genetic predisposition  
99 to obesity is attenuated by a healthy lifestyle including physical activity [8,9] and adherence to  
100 healthy dietary patterns [9–15]. However, most previous gene-environment (GxE) interaction  
101 studies primarily involved adults [8–15] or used only a candidate SNP [16], so that it is unknown  
102 whether the inherited susceptibility to obesity is modified by environmental factors already

103 during childhood and adolescence. Another limitation of previous gene-environment  
104 interaction analyses is that they were based on <100 SNPs that reached genome-wide  
105 significance in previous GWAS on BMI [3], which do not capture the whole polygenic risk profile  
106 of obesity due to their low heritability. Khera et al. suggested that the power to predict BMI by  
107 PRS can be improved by using lower p-value thresholds or even genome-wide approaches  
108 [17]. Using a genome-wide polygenic risk score based on effect estimates from [3], Khera et  
109 al. reported that the PRS-effect on weight and BMI z-scores emerges early in life and increases  
110 until adulthood and that a high PRS is a strong risk factor for severe obesity and associated  
111 diseases [17]. The authors suggested that given that the weight trajectories of individuals in  
112 different PRS deciles start to diverge early in childhood, targeted strategies for obesity  
113 prevention may have maximal effect when employed early in life. However, because lifestyle  
114 factors were not considered in their study, it is not known to which degree the genetic  
115 predisposition to obesity is modifiable by a healthy lifestyle early in life. Another limitation of  
116 [17] is the use of weight and BMI as only proxies for obesity. Since several studies have shown  
117 that classifying obesity using BMI alone misses an increasing proportion of individuals  
118 categorized as obese [18,19], it is important to test the performance of BMI-PRS for the  
119 prediction of waist circumference, which is proposed to be a better proxy for obesity-associated  
120 metabolic abnormalities [20].

121 In this study, 1) we show the prediction capacity of the PRS proposed in [17] for BMI as well  
122 as for waist circumference of European children and adolescents and 2) analyze its interaction  
123 with parental education, region of residence, selected dietary variables and physical activity to  
124 investigate to which degree the inherited susceptibility to obesity in children is modified by  
125 these sociodemographic and lifestyle factors. The analyses are based on 8,609 repeated  
126 observations from 3,098 children and adolescents aged 2 to 16 years from the pan-European  
127 IDEFICS/I.Family cohort.

128

## 129 **Methods**

### 130 *Study Population*

131 The pan-European IDEFICS/I.Family cohort [21,22] is a multi-center, prospective study on the  
132 association of social, environmental and behavioral factors with children's health status.  
133 Children were recruited through kindergarten or school settings in Belgium, Cyprus, Estonia,  
134 Germany, Hungary, Italy, Spain and Sweden. In 2007/2008, 16,229 children aged between 2  
135 and 9.9 years participated in the baseline survey. Follow-up surveys were conducted after two  
136 (FU1, N = 11,043 plus 2,543 newcomers) and six years (FU2, N = 7,117 plus 2,512 newly  
137 recruited siblings). Physical examinations covered a broad spectrum of parameters according  
138 to a detailed and standardized study protocol. Questionnaires were completed by parents for  
139 children younger than 12 years. In the second follow-up (FU2), adolescents of 12 years of age  
140 or older reported for themselves. All questionnaires were developed in English and translated  
141 into local languages. The quality of translations was checked by back translation into English.  
142 The study was conducted in agreement with the Declaration of Helsinki; all procedures were  
143 approved by the local ethics committees and written and oral informed consents were obtained  
144 from the parents, their children and adolescents, respectively, as applicable. Children were  
145 selected for a whole-genome scan based on their participation in the individual study modules.  
146 Children from Cyprus were not included in this initial genotyping to minimize population  
147 stratification.

148

### 149 *Assessment of BMI and Waist Circumference*

150 BMI was calculated as weight divided by height squared [ $\text{kg}/\text{m}^2$ ]. Height was measured to the  
151 nearest 0.1 cm by a SECA 225 Stadiometer (Seca GmbH & Co. KG., Hamburg, Germany) and  
152 body weight was measured in fasting state in light underwear on a calibrated scale accurate  
153 to 0.1 kg by a Tanita BC 420 SMA scale (TANITA, Tokyo, Japan). Waist circumference was

154 measured in upright position with relaxed abdomen and feet together using an inelastic tape  
155 (Seca 200, Birmingham, UK), precision 0.1 cm, midway between the iliac crest and the lowest  
156 rib margin to the nearest 0.1 cm [23]. Age- and sex-specific BMI and waist circumference z-  
157 scores for children and adolescents were calculated using reference data from the  
158 International Obesity Task Force [24] and from British children [25], respectively.

159

#### 160 *Genotyping and Quality Control*

161 DNA was extracted from saliva or blood samples using established procedures. Genotyping  
162 of 3,515 children was performed on the UK Biobank Axiom array (Santa Clara, USA) in two  
163 batches (2015 and 2017). Following the recommendations of [26], sample and genotype  
164 quality control measures were applied (see supplementary materials for details), resulting in  
165 3,099 children and 3,424,677 genotypes after imputation. A genetic relatedness matrix was  
166 calculated to account for the degree of relatedness within the study sample and to adjust for  
167 population stratification [27,28] by using the program EMMAX  
168 (<https://genome.sph.umich.edu/wiki/EMMAX>).

169

#### 170 *Polygenic Risk Score Calculation*

171 We calculated PRS based on genome-wide summary statistics for BMI from European  
172 ancestry populations. The PRS (called PRS-Khera) was proposed in [17]. It consists of  
173 2,100,302 SNPs and is based on summary statistics from the first large-scale GWAS of BMI  
174 (~300,000 samples) [3]. PRS-Khera was calculated in [17] using a computational algorithm  
175 called LDpred, which is a Bayesian approach to calculate a posterior mean effect for all  
176 variants using external weights with subsequent shrinkage based on linkage disequilibrium  
177 [29]. Using LDpred, each variant was reweighted according to the prior GWAS [3], the degree



178 of correlation between a variant and others nearby, and a tuning parameter that denotes the  
179 proportion of variants with non-zero effect.

180 In sensitivity analyses, the performance of PRS-Khera was compared to the PRS calculated  
181 with PRSice [30] and the PRS based on only genome-wide significant SNPs from two  
182 reference populations (same reference population as for PRS-Khera (~300,000 samples) [3]  
183 and the largest published GWAS study of BMI to date (~700,000 samples) [4]). More details  
184 on the different PRS are given in the supplementary methods and Figures S1 to S3.

185

### 186 *Assessment of Dietary Intake*

187 We used long-term and short-term dietary measurements assessed by food frequency  
188 questionnaires (FFQs) and repeated 24 hour dietary recalls, respectively [31]. A fruit and  
189 vegetable score was calculated from FFQs (for more details on the FFQs and calculation of  
190 the fruit and vegetable score, see supplemental material). We expressed the fruit and  
191 vegetable consumption as the relative frequency in relation to all foods reported in the FFQs  
192 [32]. The FFQs were self-reported by adolescents 12 years and older and proxy-reported by a  
193 parent or other caregiver for children below the age of 12 years.

194 Energy and dietary fiber intake were assessed by repeated 24 hour dietary recalls [33,34].  
195 Usual intakes for fiber were estimated based on the validated National Cancer Institute (NCI)  
196 method, which is one of the most widely accepted methods for this purpose [35,36]. This  
197 method allows for the inclusion of covariates such as age and accounts for different intakes on  
198 weekend days vs. weekdays, and further corrects for the day-to-day variation in energy and  
199 fiber intakes. Usual intakes were estimated for each child stratified by sex and considering age  
200 as a covariate. Fiber intake was here expressed in relation to total energy intake in mg/kcal.  
201 See supplemental material for more details.

202

203 *Assessment of Physical Activity*

204 Physical activity was objectively measured by using Actigraph's uniaxial or three-axial  
205 accelerometers [37,38]. At baseline and FU1, children were asked to wear the accelerometer  
206 for three days (including one weekend day) and at FU2 for a full week during waking hours  
207 (except when swimming or showering). The accelerometers were attached to the right hip with  
208 an elastic belt. Participants (either the parents or the adolescents themselves) were given  
209 written instructions on how to use the accelerometer and were asked to complete diaries to  
210 record non-wear times of the device. The daily average cumulative duration of time spent in  
211 moderate-to-vigorous physical activity (MVPA) was expressed as minutes per day according  
212 to previously defined cut-off values [39]. Especially for children, accelerometer measurements  
213 are far less prone to measurement errors than self-reported activities through questionnaires  
214 [40,41]. See supplementary material for more details.

215

216 *Assessment of Screen Time*

217 Screen time was assessed by asking how many hours per day the child/adolescent usually  
218 spends watching television (including videos or DVDs) and by another question on the time  
219 sitting in front of a computer and game console [42,43]. Responses were weighted and  
220 summed across weekdays and weekend days and the quantified frequencies from both  
221 questions were added to create a continuous variable of total screen time in hours per day.  
222 Parents reported for children younger than 12 years, while older children ( $\geq 12$  years) reported  
223 for themselves. See supplemental material for more details.

224

225 *Assessment of Sociodemographic Variables*

226 Parental education was retrieved from questionnaires and coded according to the International  
227 Standard Classification of Education (ISCED) [44]. For the analyses, the highest parental  
228 education of both parents was coded as low (ISCED levels 1 and 2;  $\leq 9$  years of education),

229 medium (ISCED levels 3 and 4) and high (ISCED levels 5 and 6;  $\geq 2$  years of education after  
230 high school). The region of residence was coded as Northern Europe (Estonia, Sweden),  
231 Central Europe (Belgium, Germany, and Hungary) and Southern Europe (Italy, Spain).

232

### 233 *Statistical Analyses*

234 Our data consist of up to three repeated measurements of individuals, some of which were  
235 siblings. We used generalized linear mixed models where the covariance matrix of the random  
236 intercept is proportional to a genetic relatedness matrix. We applied the generalized linear  
237 mixed model approach of Chen et al. [27] that jointly controls for relatedness and population  
238 stratification. All models were adjusted for sex, age, region of residence and parental  
239 education. All models that did not include fiber intake were additionally adjusted for the  
240 vegetable score. When testing associations with categorical variables (sex, region of residence  
241 and parental education), we used the category with the largest sample size as reference  
242 category.

243 All p-values from the gene-environment interaction analyses were adjusted according to the  
244 number of tested environmental factors using the false-discovery rate (FDR). We reported 95%  
245 confidence intervals (95% CI) and two-sided p-values, and considered p-values less than 0.05  
246 statistically significant. We used R 3.5.1 [45] for all statistical analyses.

247

## 248 **Results**

249 The study sample included 8,609 repeated BMI measurements from at maximum three time  
250 points (baseline, FU1, FU2) of 3,098 children aged 2 to 16 years (Table 1). The number of  
251 participants decreased only slightly between the follow-up investigations from  $n = 3,016$  at  
252 baseline (mean age 6 years) to  $n = 2,656$  at FU2 (mean age 12 years). Half of the children

253 were girls, most children came from families with a medium or high level of education and the  
254 majority lived in Central European countries. The distributions of the dietary variables  
255 (vegetable score and fiber intake) and time spent in MVPA were similar between baseline and  
256 the two follow-up samples, whereas children and adolescents spent more time in front of  
257 screens at FU1 and FU2 as compared to baseline. On average, BMI and waist circumference  
258 of our analysis group were higher than in the reference populations [24,25] (mean z-scores >  
259 0).

260 We found that the PRS-Khera provided the best prediction of BMI (see Table S1 for details on  
261 the characteristics of the other PRS). PRS-Khera was strongly associated with BMI ( $r^2 = 0.11$ ,  
262  $p\text{-value} = 7.9 \times 10^{-81}$ ) and waist circumference ( $r^2 = 0.09$ ,  $1.8 \times 10^{-71}$ ) in our study population  
263 (Table 2). Being in the top decile of the distribution of PRS-Khera was associated with 3.63  
264 times higher odds for obesity (95% CI: [2.57, 5.14]) and with 3.09 (95% CI: [2.37, 4.03]) higher  
265 odds for being in the top quartile of waist circumference.

266 The correlation between PRS-Khera and BMI increased along the age range, from a squared  
267 correlation with BMI of  $r^2 = 0.02$  [0.01, 0.12] in the 2-year olds to  $r^2 = 0.18$  [0.11, 0.27] in the  
268 14-year olds (Figure 1 and Table S2). Similar trends were found for waist circumference, for  
269 which the squared correlation with PRS-Khera was  $r^2 = 0.03$  [0.01, 0.07] in 3-year olds and  $r^2$   
270  $= 0.14$  [0.08, 0.22] in 14-year olds (Figure 1 and Table S2). This increase of correlation by age  
271 group was confirmed in our sensitivity analyses using other genome-wide PRS (Figure S4 and  
272 Table S3).

273 We found a significant gene-environment interaction of PRS-Khera with parental education  
274 (low vs. high) as well as with the European region of residence (Central vs. Southern) for BMI  
275 as well as for waist circumference (Figure 2, Tables S4). Children and adolescents from  
276 families with a low level of education were at a higher risk of becoming obese among those  
277 with higher genetic susceptibility than children from families with a high level of education (low:  
278 beta estimate from education-stratified analysis for association between PRS-Khera and BMI

279 = 0.48; 95% CI: [0.38, 0.59], high: beta estimate = 0.30; 95% CI: [0.26, 0.34], adjusted p-value  
280 interaction = 0.0106, Figure 2 and Table S4). Furthermore, children and adolescents from  
281 Southern European countries showed an increased genetic susceptibility to a high BMI in  
282 comparison to children and adolescents from Central Europe (Central Europeans: beta  
283 estimate from region-stratified analysis for association between PRS-Khera and BMI = 0.29;  
284 95% CI: [0.23, 0.34], Southern Europeans: beta estimate = 0.40; 95% CI: [0.34, 0.45], adjusted  
285 p-value interaction = 0.0246, Figure 2 and Table S4). Interactions were confirmed in our  
286 sensitivity analyses using other genome-wide PRS (Figure S5). We did not find significant  
287 interactions between PRS-Khera and sex, the comparison of low vs. medium parental  
288 education, nor the comparison of Central vs. Northern European region of residence (Figure  
289 2, Table S4).

290 The genetic susceptibility to a high BMI was further modified by intake of dietary fiber and  
291 screen time (Figure 3, Tables S4). Children and adolescents with a higher fiber intake showed  
292 an attenuated risk of becoming obese despite their genetic susceptibility (adjusted p-values  
293 for interaction: 0.025 for BMI and 0.023 for waist circumference). Furthermore, the more time  
294 the children and adolescents spent in front of screens, the higher was their risk of becoming  
295 obese among those with higher genetic susceptibility (adjusted p-value interaction = 0.042).  
296 Interactions between PRS-Khera and the fruit and vegetable score or MVPA were not  
297 significant.

298

## 299 **Discussion**

300 In our pan-European cohort of children aged 2 to 16 years, we found a strong association of a  
301 polygenic risk score of obesity with BMI as well as with waist circumference and this  
302 association increased by age. We observed a prediction  $r^2$  of 18% in 14-year olds, which is  
303 even higher than in the original study containing mainly adults [4]. We further found significant  
304 interactions with socioeconomic and behavioral factors for BMI as well as waist circumference:

305 we observed gene-environment interactions with (1) the European region of residence, which  
306 most likely reflect cultural lifestyle differences, (2) education, (3) dietary fiber intake and (4) the  
307 time children spent in front of screens. Of note, all of these interactions would have remained  
308 undetected in this sample of children when only focusing on genome-wide significant variants  
309 as was done in previous studies (compare Figures S5 and S6) [8–15].

310

### 311 *Comparison with Previous Studies*

312 Although obesity is known to be highly polygenic, most previous gene-environment interaction  
313 analyses focused on <100 genome-wide significant variants that account for <3% of BMI  
314 variation. In this study we used a genome-wide PRS proposed in [17], which provides a more  
315 comprehensive measurement of the inherited susceptibility to obesity. Using this PRS (called  
316 PRS-Khera), we observed a prediction  $r^2$  of 10.8% for BMI, which is almost 5 times higher than  
317 the prediction accuracy obtained using the <100 genome-wide significant SNPs from the  
318 ~300,000 samples in [3] and twice the prediction accuracy obtained using the <1,000 genome-  
319 wide significant SNPs from the ~700,000 samples in [4] (Table S1). PRS-Khera reached a  
320 similar prediction accuracy for BMI than it has been reported from large-scale PRS in previous  
321 studies (~10.2% using the summary statistics from the ~700,000 samples and a p-value  
322 threshold of  $10^{-3}$  (6,781 SNPs) [4] and ~8.5% [17] using a genome-wide PRS from the  
323 ~300,000 samples in [3]).

324 Of note, in our study, the prediction accuracy of the PRS strongly depended on age, reaching  
325 a prediction  $r^2$  of 18% in 14-year olds, which is in accordance with Khera et al. who showed  
326 that the association between the PRS and weight emerges early in life and increases into  
327 adulthood [17]. This surprisingly high prediction accuracy in adolescents from our study might  
328 be explained by the age difference between our study and the GIANT Consortium / UK  
329 Biobank, which was used in [4]. The GIANT Consortium / UK Biobank included mainly adults,  
330 whereas we analyzed data from children aged 2 to 16 years. In contrast to the positive  
331 correlation between age and prediction accuracy during childhood shown in this manuscript as

332 well as in previous studies [17,46], a weak negative correlation could be observed in adults  
333 >45 years of age from the UK Biobank, an age group in which aging-related diseases become  
334 more prevalent (Table S3 in [17]). Therefore, we hypothesize that the highest prediction  
335 accuracy of the PRS for BMI might be reached in adolescents and young adults.

336 In our study, we found significant interactions between PRS-Khera and sociodemographic as  
337 well as lifestyle factors for BMI and waist circumference. Interactions with socioeconomic  
338 status [9], physical activity [8,9], and dietary factors [9–15] have been reported previously.  
339 However, all of these studies included only <100 genome-wide significant SNPs (e.g. from [3]).  
340 By using a genome-wide PRS we were able to detect interactions with sociodemographic and  
341 with lifestyle factors which would have remained undetected when using only genome-wide  
342 significant SNPs (Figures S5 and S6).

343 Furthermore, previous GxE interaction studies [8–15] were mainly based on adults whereas in  
344 our study we analyzed data from children aged 2 to 16 years. Therefore, our results provide  
345 new insights about how a healthy childhood environment might partly offset a genetic  
346 predisposition to obesity during childhood and adolescence. In our study, we identified children  
347 from families with low levels of education as being about 61% more susceptible to the  
348 polygenic burden of obesity than children from families with a high level of education. In  
349 addition, we found that children from Southern Europe had a higher genetic susceptibility to  
350 obesity in comparison to children from Central Europe. Parental education and region of  
351 residence reflect a variety of social and cultural differences and many of them are difficult to  
352 capture by questionnaires. Since a previous analysis of the same cohort showed that low  
353 parental education was associated with higher intakes of unhealthy food among children, e.g.  
354 sugar-rich and fatty foods [47,48], part of the effect modification might be due to dietary habits.  
355 The differences in the risk of becoming obese among children with a higher genetic  
356 susceptibility across different European regions might be explained by differences in dietary or  
357 cultural habits [49,50].

358 Furthermore, we found an interaction between PRS-Khera and intake of fiber, with children  
359 with a higher intake of fiber having a reduced risk for obesity despite their genetic susceptibility.  
360 This finding is in line with many other studies that have shown that a healthy diet can attenuate  
361 the genetic burden of obesity [9–15]. Interactions between PRS-Khera and physical activity  
362 (MVPA) were not significant, but the direction of interaction effect was in line with previous  
363 studies [8,9]. An explanation for this might be that MVPA was only assessed in ~40% of our  
364 analysis group (Table 1), which reduced the statistical power to detect interactions between  
365 MVPA and PRS.

366

### 367 *Strengths and Limitations of this Study*

368 Important strengths of this study include: detailed and repeated phenotyping of participants in  
369 this cohort with partly objective measures (MVPA), inclusion of thousands of children from  
370 diverse regions in Europe and the longitudinal approach across key developmental periods  
371 [22]. Dietary assessment in children is a challenging task [51], and different dietary assessment  
372 have different strengths and limitations. We used two different dietary assessment methods –  
373 a fruit and vegetable score derived from FFQs and fiber intake calculated from the more  
374 detailed 24-hour dietary recalls. The harmonized protocol in all countries that was enforced by  
375 a central quality control and a central data management ensures comparability of  
376 measurements across study centers. Another major strength of our study is the application of  
377 genome-wide PRS for obesity, which has an almost 5 times higher prediction accuracy than  
378 previously used PRS [9–15] and with which we identified interactions that would have  
379 remained undetected when only focusing on genome-wide significant variants (compare  
380 Figures S5 and S6).

381 Our study also has several limitations. First, measurement errors of self-reported lifestyle  
382 behaviors are inevitable. However, measurement error in environmental exposure typically  
383 biases the interaction effect toward the null [52], which does not increase the risk for false



384 positive findings but reduces the statistical power to detect subtle interactions. Second, the  
385 use of PRS derived from associations with BMI in the analyses of waist circumference led to  
386 slightly lower prediction accuracy for waist circumference than for BMI. However, since PRS-  
387 Khera is known to be a strong risk factor for severe obesity and associated health outcomes  
388 [17], we decided to use this PRS for both obesity measurements.

389

### 390 *Conclusions*

391 Our study showed significant interactions between the polygenic risk for an increased BMI and  
392 sociodemographic and behavioral factors that affect BMI as well as waist circumference.  
393 Among children with a high genetic risk, we identified children from Southern Europe, children  
394 from families with a low level of education, children with a low intake of fiber and children who  
395 spend more time in front of screens as being particularly susceptible to obesity. These results  
396 provide evidence that the risk for obesity among children with a high genetic susceptibility  
397 varies by environmental and sociodemographic factors during childhood. This has important  
398 implications for future public health prevention efforts, because it suggests that children at a  
399 high genetic risk may benefit even more from prevention measures than children with a low  
400 genetic risk.

401 **Acknowledgments**

402 The authors wish to thank the IDEFICS children and their parents for participating in this  
403 extensive examination. We are grateful for the support of school boards, head teachers and  
404 communities, and for the effort of the study nurses, interviewers, data managers and,  
405 laboratory technicians.

406 **Competing financial interests declaration**

407 The authors have nothing to declare.

408 **References**

- 409 1 Commission on Ending Childhood Obesity. Report of the Commission on Ending  
410 Childhood Obesity. WHO. 2016.<http://www.who.int/end-childhood-obesity/en/>  
411 (accessed 11 Dec 2019).
- 412 2 GBD 2015 Obesity Collaborators, Afshin A, Forouzanfar MH, *et al.* Health effects of  
413 overweight and obesity in 195 countries over 25 years. *N Engl J Med* 2017;**377**:13–27.  
414 doi:10.1056/NEJMoa1614362
- 415 3 Locke AE, Kahali B, Berndt SI, *et al.* Genetic studies of body mass index yield new  
416 insights for obesity biology. *Nature* 2015;**518**:197–206. doi:10.1038/nature14177
- 417 4 Yengo L, Sidorenko J, Kemper KE, *et al.* Meta-analysis of genome-wide association  
418 studies for height and body mass index in ~700 000 individuals of European ancestry.  
419 *Hum Mol Genet* 2018;**27**:3641–9. doi:10.1093/hmg/ddy271
- 420 5 Wainschtein P, Jain DP, Yengo L, *et al.* Recovery of trait heritability from whole  
421 genome sequence data. *bioRxiv Prepr* 2019;:1–23. doi:<https://doi.org/10.1101/588020>
- 422 6 Dinescu D, Horn EE, Duncan G, *et al.* Socioeconomic modifiers of genetic and  
423 environmental influences on body mass index in adult twins. *Heal Psychol*  
424 2016;**35**:157–66. doi:10.1037/hea0000255
- 425 7 Silventoinen K, Hasselbalch AL, Lallukka T, *et al.* Modification effects of physical  
426 activity and protein intake on heritability of body size and composition. *Am J Clin Nutr*  
427 2009;**90**:1096–103. doi:10.3945/ajcn.2009.27689
- 428 8 Li S, Zhao JH, Luan J, *et al.* Physical activity attenuates the genetic predisposition to  
429 obesity in 20,000 men and women from EPIC-Norfolk prospective population study.  
430 *PLoS Med* 2010;**7**:1–9. doi:10.1371/journal.pmed.1000332

- 431 9 Rask-Andersen M, Karlsson T, Ek WE, *et al.* Gene-environment interaction study for  
432 BMI reveals interactions between genetic factors and physical activity, alcohol  
433 consumption and socioeconomic status. *PLoS Genet* 2017;**13**:1–20.  
434 doi:10.1371/journal.pgen.1006977
- 435 10 Wang T, Heianza Y, Sun D, *et al.* Improving adherence to healthy dietary patterns,  
436 genetic risk, and long term weight gain: Gene-diet interaction analysis in two  
437 prospective cohort studies. *BMJ* 2018;**360**:1–9. doi:10.1136/bmj.j5644
- 438 11 Wang T, Heianza Y, Sun D, *et al.* Improving fruit and vegetable intake attenuates the  
439 genetic association with long-term weight gain. *Am J Clin Nutr* 2019;**110**:759–68.  
440 doi:10.1093/ajcn/nqz136
- 441 12 Qi Q, Chu AY, Kang JH, *et al.* Fried food consumption, genetic risk, and body mass  
442 index: gene-diet interaction analysis in three US cohort studies. *BMJ* 2014;**348**:g1610.  
443 doi:10.1136/bmj.g1610
- 444 13 Ding M, Ellervik C, Huang T, *et al.* Diet quality and genetic association with body mass  
445 index: Results from 3 observational studies. *Am J Clin Nutr* 2018;**108**:1291–300.  
446 doi:10.1093/ajcn/nqy203
- 447 14 Casas-Agustench P, Arnett DK, Smith CE, *et al.* Saturated fat intake modulates the  
448 association between a genetic risk score of obesity and BMI in two US populations  
449 Patricia. *J Acad Nutr Diet* 2013;**18**:1199–216. doi:10.1016/j.micinf.2011.07.011.Innate
- 450 15 Wang T, Huang T, Kang JH, *et al.* Habitual coffee consumption and genetic  
451 predisposition to obesity: Gene-diet interaction analyses in three US prospective  
452 studies. *BMC Med* 2017;**15**:1–9. doi:10.1186/s12916-017-0862-0
- 453 16 Foraita R, Günther F, Gwozdz W, *et al.* Does the FTO gene interact with the  
454 socioeconomic status on the obesity development among young European children?

- 455 Results from the IDEFICS study. *Int J Obes* 2015;**39**:1–6. doi:10.1038/ijo.2014.156
- 456 17 Khera A V., Chaffin M, Wade KH, *et al.* Polygenic prediction of weight and obesity  
457 trajectories from birth to adulthood. *Cell* 2019;**177**:587-596.e9.  
458 doi:10.1016/j.cell.2019.03.028
- 459 18 Gearon E, Tanamas SK, Stevenson C, *et al.* Changes in waist circumference  
460 independent of weight : Implications for population level monitoring of obesity. *Prev*  
461 *Med (Baltim)* 2018;**111**:378–83. doi:10.1016/j.ypmed.2017.11.030
- 462 19 Tanamas SK, Ng WL, Backholer K, *et al.* Quantifying the proportion of deaths due to  
463 body mass index- and waist circumference-defined obesity. *Obesity* 2016;**24**:735–42.  
464 doi:10.1002/oby.21386
- 465 20 McCarthy HD. Body fat measurements in children as predictors for the metabolic  
466 syndrome: focus on waist circumference. *Proc Nutr Soc* 2006;**65**:385–92.  
467 doi:10.1017/s0029665106005143
- 468 21 Ahrens W, Bammann K, Siani A, *et al.* The IDEFICS cohort: Design, characteristics  
469 and participation in the baseline survey. *Int J Obes* 2011;**35**:3–15.  
470 doi:10.1038/ijo.2011.30
- 471 22 Ahrens W, Siani A, Adan R, *et al.* Cohort Profile: The transition from childhood to  
472 adolescence in European children-how I.Family extends the IDEFICS cohort. *Int J*  
473 *Epidemiol* 2017;**46**:1394–5. doi:10.1093/ije/dyw317
- 474 23 Ahrens W, Pigeot I, Pohlabein H, *et al.* Prevalence of overweight and obesity in  
475 European children below the age of 10. *Int J Obes* 2014;**38**:S99–107.  
476 doi:10.1038/ijo.2014.140
- 477 24 Cole TJ, Lobstein T. Extended international (IOTF) body mass index cut-offs for  
478 thinness, overweight and obesity. *Pediatr Obes* 2012;**7**:284–94. doi:10.1111/j.2047-

- 479 6310.2012.00064.x
- 480 25 McCarthy, H., Jarrett, K., Crawley H. The development of waist circumference  
481 percentiles in British. *Eur J Clin Nutr* 2001;**55**:902–7.
- 482 26 Weale ME. Quality control for genome-wide association studies. *Methods Mol Biol*  
483 2010;**628**:341–72. doi:10.1007/978-1-60327-367-1\_19
- 484 27 Chen H, Wang C, Conomos MP, *et al.* Control for population structure and relatedness  
485 for binary traits in genetic association studies via logistic mixed models. *Am J Hum*  
486 *Genet* 2016;**98**:653–66. doi:10.1016/j.ajhg.2016.02.012
- 487 28 Wang K, Hu X, Peng Y. An analytical comparison of the principal component method  
488 and the mixed effects model for association studies in the presence of cryptic  
489 relatedness and population stratification. *Hum Hered* 2013;**76**:1–9.  
490 doi:10.1159/000353345
- 491 29 Vilhjálmsson BJ, Yang J, Finucane HK, *et al.* Modeling linkage disequilibrium  
492 increases accuracy of polygenic risk scores. *Am J Hum Genet* 2015;**97**:576–92.  
493 doi:10.1016/j.ajhg.2015.09.001
- 494 30 Euesden J, Lewis CM, O’Reilly PF. PRSice: Polygenic Risk Score software.  
495 *Bioinformatics* 2015;**31**:1466–8. doi:10.1093/bioinformatics/btu848
- 496 31 Illner AK, Freisling H, Boeing H, *et al.* Review and evaluation of innovative  
497 technologies for measuring diet in nutritional epidemiology. *Int J Epidemiol*  
498 2012;**41**:1187–203. doi:10.1093/ije/dys105
- 499 32 Arvidsson L, Bogl LH, Eiben G, *et al.* Fat, sugar and water intakes among families  
500 from the IDEFICS intervention and control groups: First observations from I.Family.  
501 *Obes Rev* 2015;**16**:127–37. doi:10.1111/obr.12325

- 502 33 Intemann T, Pigeot I, De Henauw S, *et al.* Urinary sucrose and fructose to validate  
503 self-reported sugar intake in children and adolescents: results from the I.Family study.  
504 *Eur J Nutr* 2019;**58**:1247–58. doi:10.1007/s00394-018-1649-6
- 505 34 Bogl LH, Silventoinen K, Hebestreit A, *et al.* Familial resemblance in dietary intakes of  
506 children, adolescents, and parents: Does dietary quality play a role? *Nutrients* 2017;**9**.  
507 doi:10.3390/nu9080892
- 508 35 Kipnis V, Midthune D, Buckman DW, *et al.* Modeling data with excess zeros and  
509 measurement error: application to evaluating relationships between episodically  
510 consumed foods and health outcomes. *Biometrics* 2009;**65**:1003–10.  
511 doi:10.1111/j.1541-0420.2009.01223.x
- 512 36 Tooze JA, Midthune D, Dodd KW, *et al.* A new statistical method for estimating the  
513 usual intake of episodically consumed foods with application to their distribution. *J Am*  
514 *Diet Assoc* 2006;**106**:1575–87. doi:10.1016/j.jada.2006.07.003
- 515 37 Konstabel K, Chopra S, Ojiambo R, *et al.* Accelerometry-based physical activity  
516 assessment for children and adolescents. In: Bammann K, Lissner L, Pigeot I, *et al.*,  
517 eds. *Instruments for Health Surveys in Children and Adolescents*. Springer, Cham  
518 2019. 135–73. doi:10.1007/978-3-319-98857-3\_7
- 519 38 Konstabel K, Veidebaum T, Verbestel V, *et al.* Objectively measured physical activity  
520 in European children : the IDEFICS study. *Int J Obes* 2014;**38**:135–43.  
521 doi:10.1038/ijo.2014.144
- 522 39 Evenson KR, Catellier DJ, Gill K, *et al.* Calibration of two objective measures of  
523 physical activity for children. *J Sports Sci* 2008;**26**:1557–65.  
524 doi:10.1080/02640410802334196
- 525 40 Janz KF. Physical activity in epidemiology: Moving from questionnaire to objective

- 526 measurement. *Br J Sports Med* 2006;**40**:191–2. doi:10.1136/bjism.2005.023036
- 527 41 Adamo KB, Prince SA, Tricco AC, *et al.* A comparison of indirect versus direct  
528 measures for assessing physical activity in the pediatric population: a systematic  
529 review. *Int J Pediatr Obes* 2009;**4**:2–27. doi:10.1080/17477160802315010
- 530 42 Olafsdottir S, Berg C, Eiben G, *et al.* Young children’s screen activities, sweet drink  
531 consumption and anthropometry: results from a prospective European study. *Eur J*  
532 *Clin Nutr* 2014;**68**:223–8. doi:10.1038/ejcn.2013.234
- 533 43 Bogl LH, Mehlig K, Intemann T, *et al.* A within-sibling pair analysis of lifestyle  
534 behaviours and BMI z-score in the multi-centre I.Family study. *Nutr Metab Cardiovasc*  
535 *Dis NMCD* 2019;**29**:580–9. doi:10.1016/j.numecd.2019.01.017
- 536 44 UNESCO. International Standard Classification of Education ISCED 2011. Montreal,  
537 QC: 2012.
- 538 45 R Core Team. R: A language and environment for statistical computing.  
539 2018.<https://www.r-project.org/>
- 540 46 Silventoinen K, Jelenkovic A, Sund R, *et al.* Genetic and environmental effects on  
541 body mass index from infancy to the onset of adulthood: An individual-based pooled  
542 analysis of 45 twin cohorts participating in the COllaborative project of Development of  
543 Anthropometrical measures in Twins (CODATwins). *Am J Clin Nutr* 2016;**104**:371–9.  
544 doi:10.3945/ajcn.116.130252
- 545 47 Fernandez-Alvira JM, Mouratidou T, Bammann K, *et al.* Parental education and  
546 frequency of food consumption in European children : the IDEFICS study. *Public*  
547 *Health Nutr* 2012;**16**:487–98. doi:10.1017/S136898001200290X
- 548 48 Fernández-Alvira JM, Bammann K, Pala V, *et al.* Country-specific dietary patterns and  
549 associations with socioeconomic status in European children: the IDEFICS study. *Eur*



- 550 *J Clin Nutr* 2014;**68**:811–21. doi:10.1038/ejcn.2014.78
- 551 49 Tognon G, Hebestreit A, Lanfer A, *et al.* Mediterranean diet, overweight and body  
552 composition in children from eight European countries: cross-sectional and  
553 prospective results from the IDEFICS study. *Nutr Metab Cardiovasc Dis NMCD*  
554 2014;**24**:205–13. doi:10.1016/j.numecd.2013.04.013
- 555 50 Lissner L, Lanfer A, Gwozdz W, *et al.* Television habits in relation to overweight, diet  
556 and taste preferences in European children: the IDEFICS study. *Eur J Epidemiol*  
557 2012;**27**:705–15. doi:10.1007/s10654-012-9718-2
- 558 51 Livingstone MBE, Robson PJ, Wallace JMW. Issues in dietary intake assessment of  
559 children and adolescents. *Br J Nutr* 2004;**92**:S213–22. doi:10.1079/bjn20041169
- 560 52 Paeratakul S, Popkin BM, Kohlmeier L, *et al.* Measurement error in dietary data:  
561 implications for the epidemiologic study of the diet-disease relationship. *Eur J Clin Nutr*  
562 1998;**52**:722–7. doi:10.1038/sj.ejcn.1600633
- 563

## Tables

**Table 1. Study characteristics of the 8,609 repeated observations from 3,098 children.**

|                                      | Baseline     | First follow-up<br>(FU1) | Second follow-up<br>(FU2) |
|--------------------------------------|--------------|--------------------------|---------------------------|
| <b>n</b>                             | 3016         | 2937                     | 2656                      |
| <b>Age (years)</b>                   |              |                          |                           |
| Mean (SD)                            | 6.19 (1.77)  | 8.12 (1.80)              | 11.75 (1.83)              |
| Median (IQR)                         | 6.60 (3.10)  | 8.50 (3.20)              | 11.90 (3.20)              |
| Range                                | 2.0-9.7      | 3.4-11.9                 | 6.6-16.2                  |
| <b>Sex</b>                           |              |                          |                           |
| Female (%)                           | 1510 (50.07) | 1472 (50.12)             | 1331 (50.11)              |
| Male (%)                             | 1506 (49.93) | 1465 (49.88)             | 1325 (49.89)              |
| <b>Parental education</b>            |              |                          |                           |
| Low (%)                              | 180 (5.97)   | 166 (5.65)               | 156 (5.87)                |
| Medium (%)                           | 1337 (44.33) | 1204 (40.99)             | 1172 (44.13)              |
| High (%)                             | 1463 (48.51) | 1476 (50.26)             | 1310 (49.32)              |
| <b>European region of residence</b>  |              |                          |                           |
| Central (%)                          | 1250 (41.45) | 1218 (41.47)             | 1114 (41.94)              |
| North (%)                            | 743 (24.64)  | 721 (24.55)              | 682 (25.68)               |
| South (%)                            | 1023 (33.92) | 998 (33.98)              | 860 (32.38)               |
| <b>Fruit and vegetable score (%)</b> |              |                          |                           |
| Mean (SD)                            | 1.47 (0.75)  | 1.54 (0.80)              | 1.47 (0.78)               |
| Median (IQR)                         | 1.38 (0.96)  | 1.47 (1.02)              | 1.37 (0.97)               |
| Range                                | 0.00-5.71    | 0.00-5.83                | 0.00-6.07                 |
| Missing                              | 58           | 154                      | 106                       |
| <b>Fiber intake (mg/kcal)</b>        |              |                          |                           |
| Mean (SD)                            | 8.17 (1.31)  | 8.23 (0.90)              | 8.22 (1.27)               |
| Median (IQR)                         | 8.13 (1.79)  | 8.13 (1.48)              | 8.07 (1.61)               |
| Range                                | 3.87-15.76   | 5.76-11.56               | 4.74-13.89                |
| Missing                              | 826          | 1100                     | 660                       |
| <b>MVPA (hours/day)</b>              |              |                          |                           |
| Mean (SD)                            | 0.67 (0.36)  | 0.67 (0.36)              | 0.64 (0.37)               |
| Median (IQR)                         | 0.61 (0.46)  | 0.62 (0.47)              | 0.57 (0.47)               |
| Range                                | 0.02-2.29    | 0.03-2.74                | 0.00-2.42                 |
| Missing                              | 1240         | 1297                     | 871                       |
| <b>Screen time (hours/day)</b>       |              |                          |                           |
| Mean (SD)                            | 1.60 (1.00)  | 1.89 (1.08)              | 2.34 (1.50)               |
| Median (IQR)                         | 1.50 (1.07)  | 1.75 (1.43)              | 2.02 (1.79)               |
| Range                                | 0.00-8.00    | 0.00-8.00                | 0.00-8.00                 |
| Missing                              | 93           | 132                      | 150                       |
| <b>BMI z-scores</b>                  |              |                          |                           |
| Mean (SD)                            | 0.34 (1.16)  | 0.41 (1.18)              | 0.51 (1.12)               |
| Median (IQR)                         | 0.23 (1.48)  | 0.32 (1.67)              | 0.45 (1.62)               |
| Range                                | -5.42-5.80   | -5.76-4.65               | -2.96-3.83                |
| Obese                                | 204          | 214                      | 179                       |
| <b>Waist circumference z-scores</b>  |              |                          |                           |
| Mean (SD)                            | 0.24 (1.45)  | 0.59 (1.29)              | 0.78 (1.25)               |
| Median (IQR)                         | 0.16 (1.61)  | 0.46 (1.72)              | 0.71 (1.77)               |
| Range                                | -27.98-5.65  | -6.79-5.33               | -7.75-4.38                |
| Top quartile                         | 461          | 443                      | 316                       |
| Missing                              | 76           | 22                       | 55                        |

Z-scores for BMI and waist circumference were calculated according to [24,25]. Boys with a BMI z-score > 2.29 and girls with a BMI z-score > 2.19 were defined as obese [24,25].

**Table 2. Associations of PRS-Khera with BMI, obesity and waist circumference in IDEFICS/I.Family.**

| <b>A) BMI</b>       |                     |                |                      |                   |                |            |
|---------------------|---------------------|----------------|----------------------|-------------------|----------------|------------|
| <b>Scale of PRS</b> | <b>BMI</b>          |                |                      | <b>Obesity</b>    |                |            |
|                     | <b>Est., 95% CI</b> | <b>p-value</b> | <b>R<sup>2</sup></b> | <b>OR, 95% CI</b> | <b>p-value</b> | <b>AUC</b> |
| <b>Continuous</b>   | 0.33 [0.30, 0.37]   | 7.9e-81        | 0.108                | 2.33 [2.01, 2.70] | 2.0e-29        | 0.736      |
| <b>Top decile</b>   | 0.61 [0.49, 0.73]   | 5.4e-24        | 0.036                | 3.63 [2.57, 5.14] | 2.7e-13        | 0.598      |

  

| <b>B) Waist circumference</b> |                            |                |                      |                           |                |            |
|-------------------------------|----------------------------|----------------|----------------------|---------------------------|----------------|------------|
| <b>Scale of PRS</b>           | <b>Waist circumference</b> |                |                      | <b>Waist top quartile</b> |                |            |
|                               | <b>Est., 95% CI</b>        | <b>p-value</b> | <b>R<sup>2</sup></b> | <b>OR, 95% CI</b>         | <b>p-value</b> | <b>AUC</b> |
| <b>Continuous</b>             | 0.36 [0.32, 0.40]          | 1.8e-71        | 0.088                | 1.97 [1.78,2.17]          | 1.5e-40        | 0.683      |
| <b>Top decile</b>             | 0.69 [0.55, 0.82]          | 8.8e-24        | 0.032                | 3.09 [2.37,4.03]          | 6.1e-17        | 0.569      |

Associations adjusted for region of residence, sex, age, parental education, vegetable score. Z-scores for BMI and waist circumference were calculated according to [24,25]. Boys with a BMI z-score > 2.29 and girls with a BMI z-score > 2.19 were defined as obese [24,25].

## Figure Legends

**Figure 1. Squared correlation ( $r^2$  with 95% confidence intervals) of PRS-Khera with BMI and waist circumference in dependence of age.** Squared correlations could not be calculated for  $\geq 15$ -year old children due to the small sample size in these age groups (see Tables S1 & S2). Waist circumference was not measured in 2-year old children.

**Figure 2. Interactions between PRS-Khera and sociodemographic factors on BMI and waist circumference.** Associations between PRS and BMI / waist circumference are shown in different strata (beta estimates and 95% CIs) as well as in the whole study population (**red** line). Raw p-values ( $p_r$ ) and FDR-adjusted p-values ( $p_a$ ) are given for the test of deviations of the association between PRS and obesity in one subgroup in comparison to the reference category (interaction). The category without p-values is the reference category.

**Figure 3. Interactions between PRS-Khera and lifestyle factors on BMI and waist circumference.** Associations between PRS and obesity are shown in dependence of the PRS (beta estimates and 95% CIs) as well as in the whole study population (**red** line). The distributions of the lifestyle factors are shown in histograms. Raw p-values ( $p_r$ ) and FDR-adjusted p-values ( $p_a$ ) are given for the interaction terms.

BMI

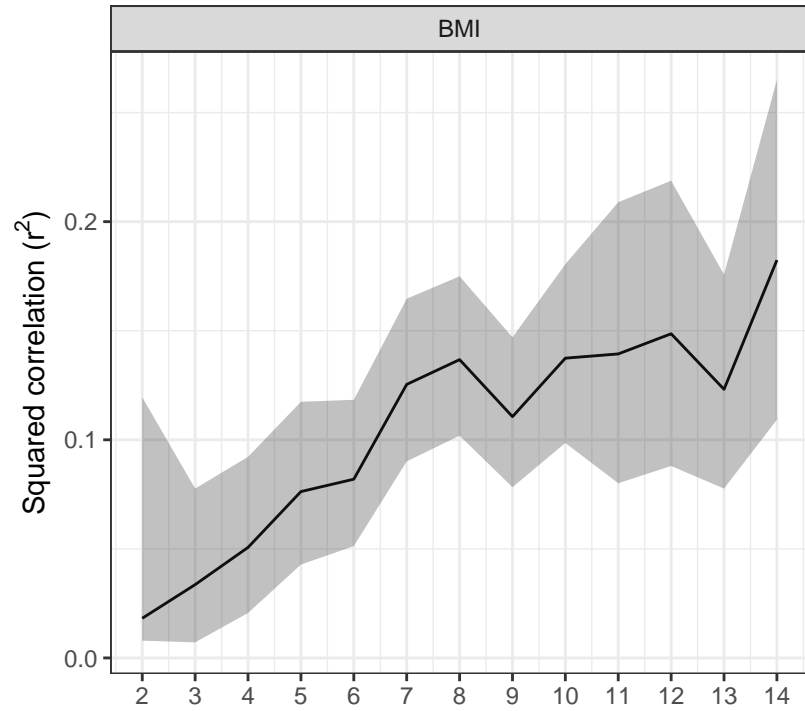

Waist circumference

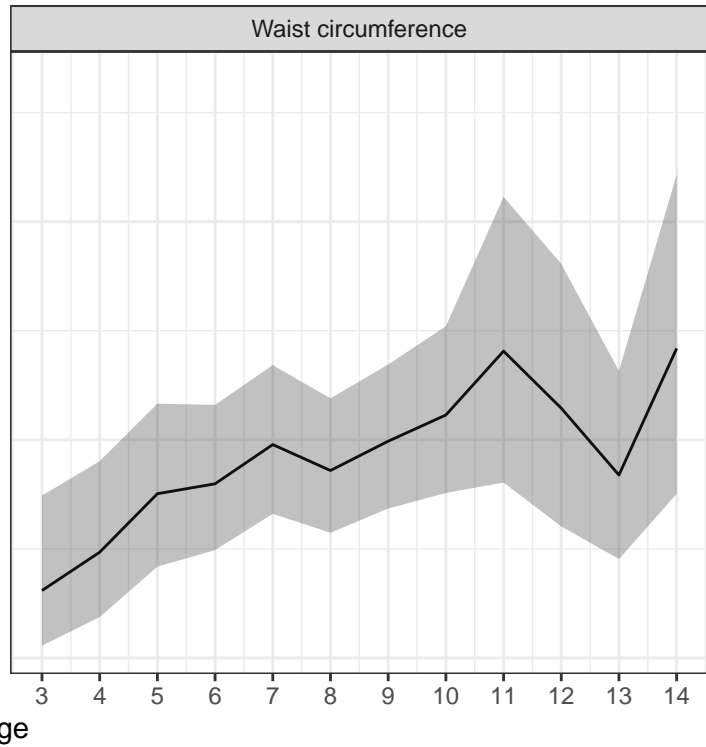

## A) BMI

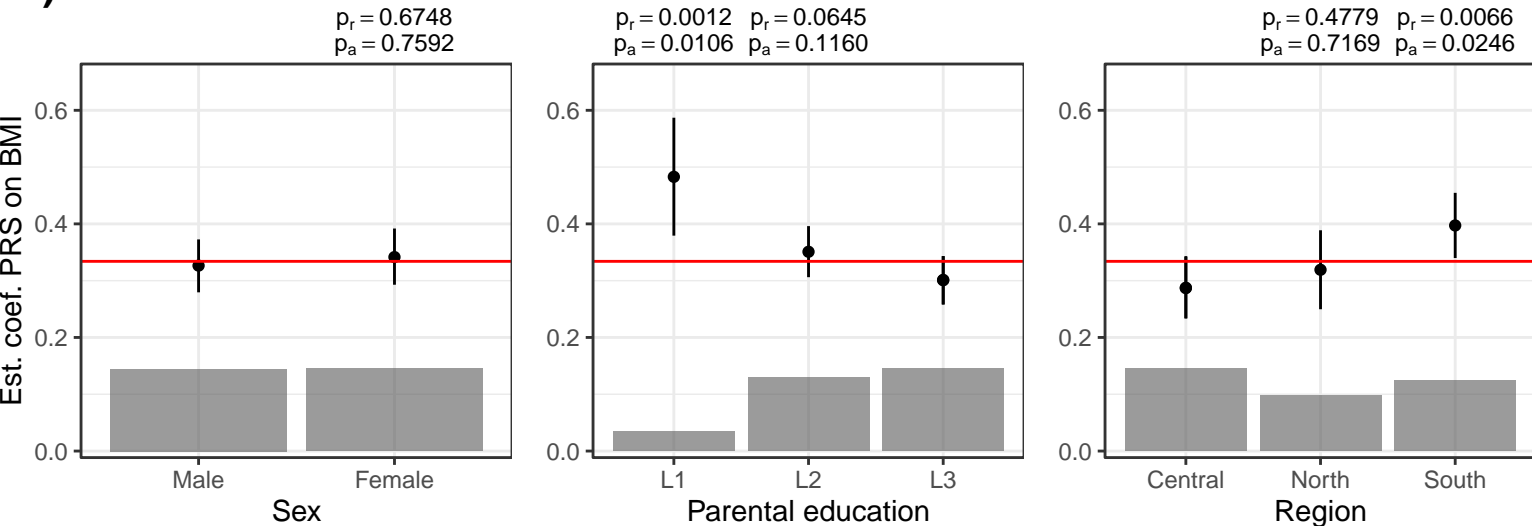

## B) Waist circumference

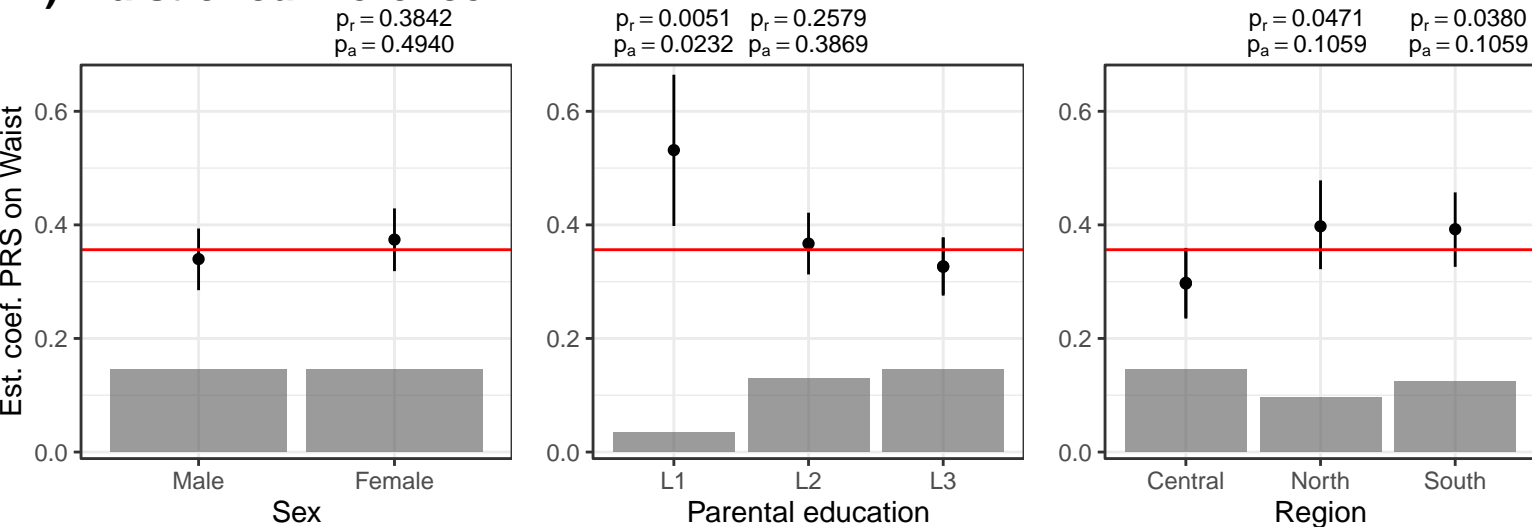

## A) BMI

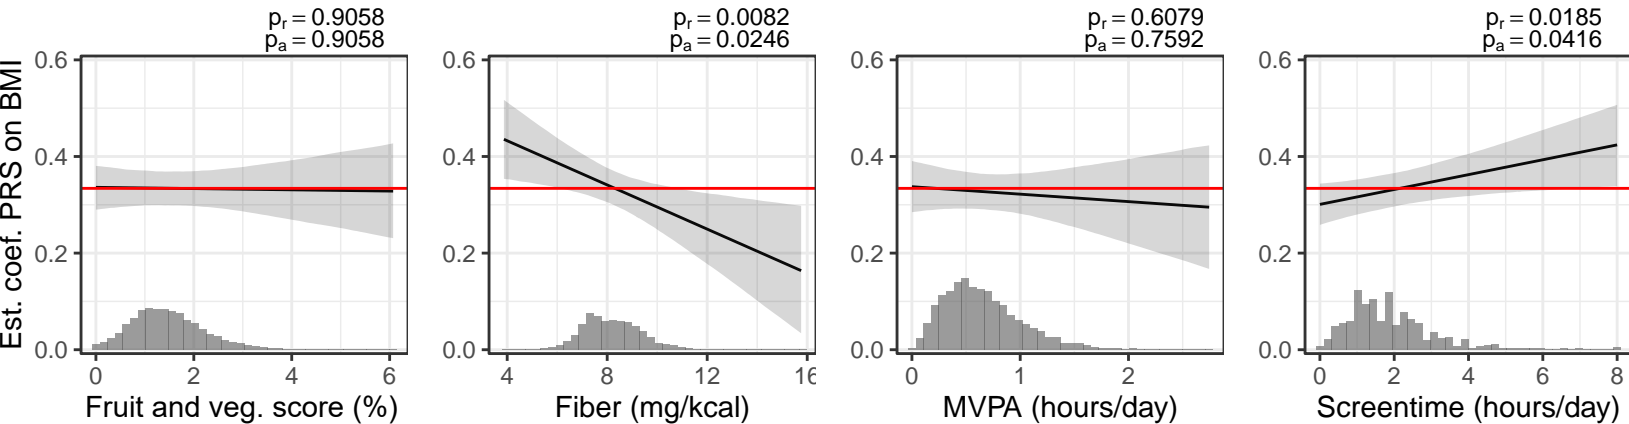

## B) Waist circumference

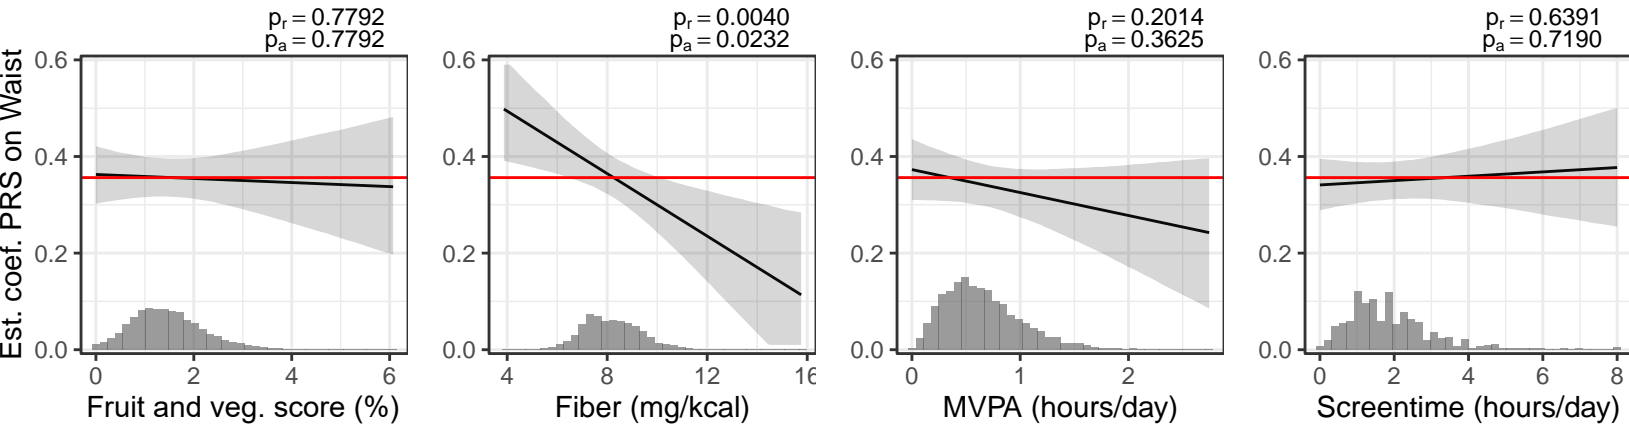

Source: https://www.biorxiv.org/content/biorxiv/early/2020/01/14/2020.01.13.905125.full.pdf
